# Supplementary figures and images for: The association of P53 and Rb1 mutation in endometrial cancer development
Source: Research Square preprint supplement (doi:10.21203/rs.3.rs-6091807/v1), 2025-04-17

## Confirmation of the genotype by PCR

Kilobases

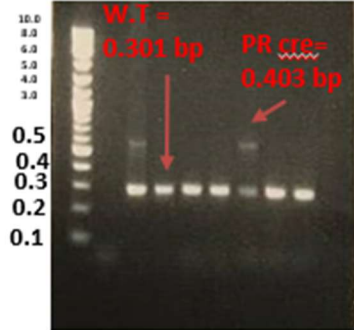

P5PR cre

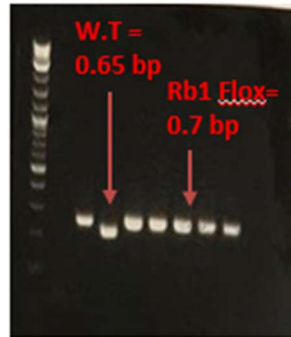

Rb1 loxp/loxp

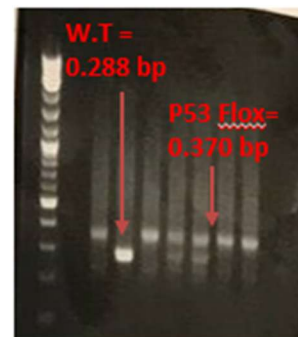

P53 loxp/loxp

Supplement: Supplementary file 1 [file 2b778fe8d3b9c89faa1fd3c4.pdf]
